# Supplementary material for: Early CD4+ T Cell Responses Are Associated with Subsequent CD8+ T Cell Responses to an rAd5-Based Prophylactic Prime-Boost HIV Vaccine Strategy
Source: PubMed Central journal article supplement (PMC4849671; doi:10.1371/journal.pone.0152952), 2016-04-28
Supplement: pone.0152952.s001.pdf [file pone.0152952.s001.pdf]

**Early CD4+ T cell responses are associated with subsequent CD8+ T cell responses to a rAd5-based prophylactic prime-boost HIV vaccine strategy**

Edouard Lhomme, Laura Richert, Zoe Moodie, Chloé Pasin, Spyros A. Kalams, Cecilia Morgan, Steve Self, Stephen C. De Rosa, Rodolphe Thiébaud

**Supporting Information**

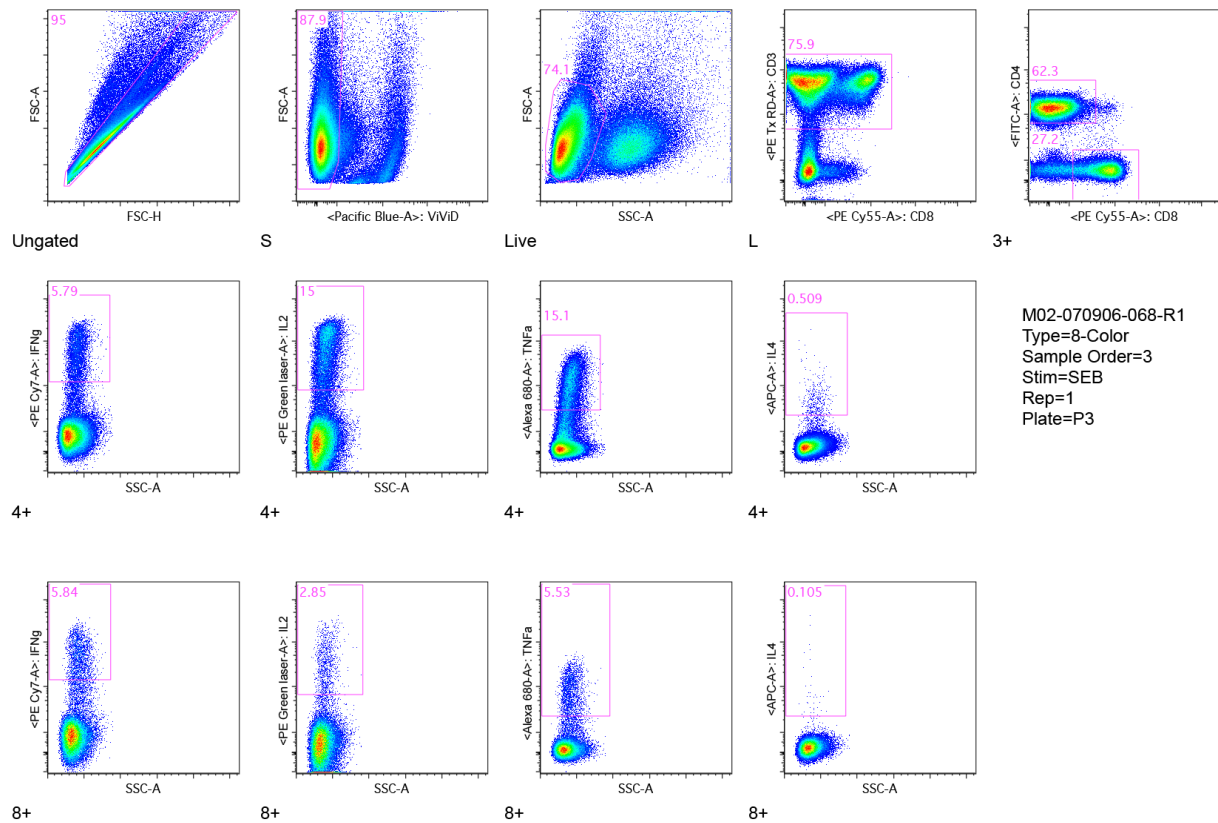

**Appendix A. Example of gating hierarchy for 8-color ICS assay.**

The upper row shows the series of gates to identify CD4+ and CD8+ T cells. In order, cells are gated for singlets, live cells, lymphocytes, CD3+ T cells and then CD4+ and CD8+ T cells. The middle and lower rows show the cytokine gates for CD4+ and CD8+ T cells, respectively. This is an example for the SEB positive control. The numbers in the gates show the percent of the gated cells of the parent gate.

**Appendix B. Description of the two linear mixed regression models used to model IFN- $\gamma$  producing cytotoxic CD8+ T cells (CD8+ IFN- $\gamma$ + T cells) as a function of IL-2 producing CD4+ helper T cells (CD4+ IL-2+ T cells) and time**

**Model 1**

$$\text{LT CD8 IFN}_{ij} = \beta_0 + \beta_1 \text{LT CD4 IL2}_{ij} + \sum_{k=1}^K \beta_k S_k(t) + \gamma_{0i} + \sum_{k=1}^K \gamma_k S_k(t) + \varepsilon_{ij}$$

where  $S_k$  are splines of time,

$$\gamma_i = \begin{pmatrix} \gamma_{0i} \\ \gamma_{ki} \end{pmatrix} \sim N \left( \begin{bmatrix} 0 \\ 0 \end{bmatrix}, \begin{bmatrix} \sigma_{\gamma_0}^2 & \sigma_{\gamma_0 \gamma_k} \\ \sigma_{\gamma_0 \gamma_k} & \sigma_{\gamma_k}^2 \end{bmatrix} \right) \text{ and } \varepsilon_{ij} \sim N(0, \sigma_\varepsilon^2) \text{ are independent.}$$

**Model 2**

$$\begin{aligned} \text{LT CD8 IFN}_{ij} = & \beta_0 + \beta_1 (\text{LT CD4 IL2}_{ij}) I_{j < 14} + \beta_2 (\text{LT CD4 IL2}_{ij}) I'_{j \geq 14} + \sum_{k=1}^K \beta_k S_k(t) \\ & + \gamma_{0i} + \sum_{k=1}^K \gamma_k S_k(t) + \varepsilon_{ij} \end{aligned}$$

where  $S_k$  are splines of time,

$$\gamma_i = \begin{pmatrix} \gamma_{0i} \\ \gamma_{ki} \end{pmatrix} \sim N \left( \begin{bmatrix} 0 \\ 0 \end{bmatrix}, \begin{bmatrix} \sigma_{\gamma_0}^2 & \sigma_{\gamma_0 \gamma_k} \\ \sigma_{\gamma_0 \gamma_k} & \sigma_{\gamma_k}^2 \end{bmatrix} \right) \text{ and } \varepsilon_{ij} \sim N(0, \sigma_\varepsilon^2) \text{ are independent.}$$

Appendix C. Spearman correlations between IFN- $\gamma$  producing cytotoxic CD8+ T cells (CD8+ IFN- $\gamma$ + T cells) and IL-2 producing CD4+ helper T cells (CD4+ IL-2+ T cells) across follow-up in the rAd5-rAd5 group (Env ex-vivo stimulation of PBMC), HVTN 068 trial

| CD8+ IFN- $\gamma$ + T cells (%) |                | CD4+ IL-2+ T cells (%) |             |       |       |       |       |       |             |      |       |      |       |      |
|----------------------------------|----------------|------------------------|-------------|-------|-------|-------|-------|-------|-------------|------|-------|------|-------|------|
|                                  |                | Prime                  |             |       |       |       |       | Boost |             |      |       |      |       |      |
|                                  |                | W 1                    | W 2         | W 3   | W 4   | W 6   | W 8   | W24   | W 25        | W 26 | W 27  | W 28 | W 30  | W 52 |
| <b>Prime</b>                     |                |                        |             |       |       |       |       |       |             |      |       |      |       |      |
| <b>W 1</b>                       | r              | -0.01                  | 0.17        | -0.14 | -0.10 | -0.08 | -0.09 | -0.08 | 0.14        | 0.10 | -0.06 | 0.10 | -0.06 | 0.07 |
|                                  | <i>p-value</i> | 0.89                   | 0.63        | 0.69  | 0.73  | 0.74  | 0.73  | 0.74  | 0.72        | 0.73 | 0.79  | 0.73 | 0.79  | 0.75 |
| <b>W 2</b>                       | r              | 0.34                   | <b>0.67</b> | 0.19  | 0.28  | 0.18  | 0.25  | 0.04  | 0.66        | 0.33 | 0.30  | 0.33 | 0.23  | 0.40 |
|                                  | <i>p-value</i> | 0.39                   | <b>0.02</b> | 0.55  | 0.39  | 0.61  | 0.47  | 0.82  | <b>0.06</b> | 0.36 | 0.45  | 0.36 | 0.55  | 0.26 |
| <b>W 3</b>                       | r              | 0.30                   | <b>0.65</b> | 0.33  | 0.33  | 0.27  | 0.37  | 0.16  | 0.50        | 0.36 | 0.42  | 0.42 | 0.41  | 0.48 |
|                                  | <i>p-value</i> | 0.45                   | <b>0.02</b> | 0.33  | 0.33  | 0.47  | 0.35  | 0.64  | 0.26        | 0.33 | 0.33  | 0.26 | 0.33  | 0.18 |
| <b>W 4</b>                       | r              | 0.22                   | <b>0.63</b> | 0.28  | 0.28  | 0.31  | 0.32  | 0.22  | 0.49        | 0.52 | 0.40  | 0.53 | 0.46  | 0.44 |
|                                  | <i>p-value</i> | 0.56                   | <b>0.04</b> | 0.41  | 0.41  | 0.44  | 0.42  | 0.56  | 0.26        | 0.16 | 0.35  | 0.13 | 0.29  | 0.26 |
| <b>W 6</b>                       | r              | 0.11                   | 0.56        | 0.37  | 0.27  | 0.07  | 0.07  | 0.17  | 0.34        | 0.12 | 0.30  | 0.32 | 0.24  | 0.40 |
|                                  | <i>p-value</i> | 0.71                   | 0.18        | 0.38  | 0.48  | 0.74  | 0.74  | 0.63  | 0.44        | 0.70 | 0.44  | 0.43 | 0.50  | 0.33 |
| <b>W 8</b>                       | r              | 0.09                   | 0.57        | 0.36  | 0.21  | 0.18  | 0.22  | 0.12  | 0.31        | 0.16 | 0.19  | 0.11 | 0.20  | 0.42 |
|                                  | <i>p-value</i> | 0.74                   | 0.16        | 0.40  | 0.58  | 0.60  | 0.55  | 0.70  | 0.48        | 0.63 | 0.60  | 0.71 | 0.58  | 0.32 |
| <b>Boost</b>                     |                |                        |             |       |       |       |       |       |             |      |       |      |       |      |
| <b>W 24</b>                      | r              | -0.00                  | 0.48        | 0.15  | 0.05  | 0.17  | 0.21  | 0.16  | 0.10        | 0.20 | 0.08  | 0.27 | 0.20  | 0.37 |
|                                  | <i>p-value</i> | 0.92                   | 0.26        | 0.68  | 0.81  | 0.63  | 0.58  | 0.63  | 0.74        | 0.58 | 0.74  | 0.48 | 0.58  | 0.39 |

|             |                |      |             |      |      |      |      |      |             |      |      |      |      |      |
|-------------|----------------|------|-------------|------|------|------|------|------|-------------|------|------|------|------|------|
| <b>W 25</b> | r              | 0.36 | <b>0.63</b> | 0.37 | 0.49 | 0.53 | 0.58 | 0.33 | 0.27        | 0.50 | 0.55 | 0.41 | 0.58 | 0.46 |
|             | <i>p-value</i> | 0.45 | <b>0.09</b> | 0.37 | 0.26 | 0.26 | 0.26 | 0.48 | 0.45        | 0.26 | 0.26 | 0.33 | 0.26 | 0.26 |
| <b>W 26</b> | r              | 0.15 | <b>0.59</b> | 0.01 | 0.08 | 0.08 | 0.23 | 0.24 | 0.59        | 0.37 | 0.23 | 0.34 | 0.35 | 0.58 |
|             | <i>p-value</i> | 0.67 | <b>0.10</b> | 0.89 | 0.74 | 0.74 | 0.55 | 0.53 | 0.16        | 0.32 | 0.58 | 0.36 | 0.39 | 0.11 |
| <b>W 27</b> | r              | 0.28 | <b>0.76</b> | 0.50 | 0.39 | 0.47 | 0.44 | 0.39 | 0.59        | 0.47 | 0.47 | 0.50 | 0.31 | 0.59 |
|             | <i>p-value</i> | 0.48 | <b>0.02</b> | 0.26 | 0.33 | 0.26 | 0.29 | 0.36 | 0.26        | 0.27 | 0.26 | 0.26 | 0.44 | 0.16 |
| <b>W 28</b> | r              | 0.18 | <b>0.57</b> | 0.23 | 0.21 | 0.11 | 0.14 | 0.12 | 0.38        | 0.27 | 0.23 | 0.35 | 0.29 | 0.54 |
|             | <i>p-value</i> | 0.61 | <b>0.10</b> | 0.26 | 0.50 | 0.71 | 0.67 | 0.70 | 0.33        | 0.44 | 0.56 | 0.33 | 0.46 | 0.14 |
| <b>W 30</b> | r              | 0.18 | <b>0.75</b> | 0.38 | 0.19 | 0.27 | 0.27 | 0.14 | 0.38        | 0.39 | 0.26 | 0.28 | 0.29 | 0.44 |
|             | <i>p-value</i> | 0.61 | <b>0.02</b> | 0.37 | 0.61 | 0.45 | 0.47 | 0.68 | 0.41        | 0.33 | 0.48 | 0.47 | 0.44 | 0.29 |
| <b>W 52</b> | r              | 0.19 | <b>0.62</b> | 0.16 | 0.13 | 0.16 | 0.13 | 0.01 | 0.65        | 0.29 | 0.13 | 0.18 | 0.14 | 0.35 |
|             | <i>p-value</i> | 0.61 | <b>0.05</b> | 0.60 | 0.66 | 0.63 | 0.68 | 0.88 | <b>0.06</b> | 0.42 | 0.69 | 0.58 | 0.67 | 0.29 |

FDR-adjusted p-values < 0.10 were considered statistically significant and are presented in bold.

Appendix D. Spearman correlations between IFN- $\gamma$  producing cytotoxic CD8+ T cells (CD8+ IFN- $\gamma$ + T cells) and of IL-2 producing CD4+ helper T cells (CD4+ IL-2+ T cells) across follow-up in the DNA-rAd5 group (Env ex-vivo stimulation of PBMC), HVTN 068 trial

| CD8+ IFN- $\gamma$ + T cells (%) |                | CD4+ IL-2+ T cells (%) |       |       |       |      |       |       |       |       |       |       |       |       |       |
|----------------------------------|----------------|------------------------|-------|-------|-------|------|-------|-------|-------|-------|-------|-------|-------|-------|-------|
|                                  |                | Prime                  |       |       |       |      |       |       | Boost |       |       |       |       |       |       |
|                                  |                | W 2                    | W 4   | W 5   | W 6   | W 7  | W 8   | W 10  | W 24  | W 25  | W 26  | W 27  | W 28  | W 30  | W 52  |
| <b>Prime</b>                     |                |                        |       |       |       |      |       |       |       |       |       |       |       |       |       |
| <b>W 2</b>                       | r              | 0.27                   | -0.38 | -0.25 | -0.22 | 0.04 | 0.00  | 0.14  | -0.02 | -0.25 | -0.17 | -0.21 | 0.03  | 0.02  | -0.06 |
|                                  | <i>p-value</i> | 0.99                   | 0.99  | 0.99  | 0.99  | 0.99 | 0.99  | 0.99  | 0.99  | 0.99  | 0.99  | 0.99  | 0.99  | 0.99  | 0.99  |
| <b>W 4</b>                       | r              | 0.02                   | -0.04 | -0.07 | -0.31 | -0.3 | -0.23 | -0.13 | -0.22 | -0.26 | -0.11 | -0.33 | -0.16 | -0.17 | -0.38 |
|                                  | <i>p-value</i> | 0.99                   | 0.99  | 0.99  | 0.99  | 0.99 | 0.99  | 0.99  | 0.99  | 0.99  | 0.99  | 0.99  | 0.99  | 0.99  | 0.99  |
| <b>W 5</b>                       | r              | 0.04                   | -0.11 | 0.11  | -0.23 | -0.0 | -0.10 | -0.08 | -0.19 | -0.19 | -0.03 | -0.16 | -0.02 | -0.13 | -0.19 |
|                                  | <i>p-value</i> | 0.99                   | 0.99  | 0.99  | 0.99  | 0.99 | 0.99  | 0.99  | 0.99  | 0.99  | 0.99  | 0.99  | 0.99  | 0.99  | 0.99  |
| <b>W 6</b>                       | r              | -0.38                  | 0.12  | -0.14 | -0.22 | 0.18 | 0.01  | -0.03 | -0.09 | -0.29 | 0.02  | -0.21 | 0.13  | -0.07 | -0.27 |
|                                  | <i>p-value</i> | 0.99                   | 0.99  | 0.99  | 0.99  | 0.99 | 0.99  | 0.99  | 0.99  | 0.99  | 0.99  | 0.99  | 0.99  | 0.99  | 0.99  |
| <b>W 7</b>                       | r              | -0.04                  | 0.17  | 0.50  | 0.19  | 0.11 | 0.20  | 0.33  | 0.13  | 0.05  | -0.12 | 0.08  | 0.31  | 0.49  | 0.39  |
|                                  | <i>p-value</i> | 0.99                   | 0.99  | 0.99  | 0.99  | 0.99 | 0.99  | 0.99  | 0.99  | 0.99  | 0.99  | 0.99  | 0.99  | 0.99  | 0.99  |
| <b>W 8</b>                       | r              | -0.03                  | -0.18 | 0.02  | -0.10 | 0.24 | 0.02  | 0.12  | 0.08  | 0.18  | 0.01  | -0.10 | 0.16  | 0.18  | 0.06  |
|                                  | <i>p-value</i> | 0.99                   | 0.99  | 0.99  | 0.99  | 0.99 | 0.99  | 0.99  | 0.99  | 0.99  | 0.99  | 0.99  | 0.99  | 0.99  | 0.99  |
| <b>W 10</b>                      | r              | -0.15                  | -0.31 | 0.26  | 0.04  | 0.28 | 0.00  | 0.12  | 0.10  | 0.01  | -0.02 | -0.11 | 0.07  | 0.16  | 0.21  |
|                                  | <i>p-value</i> | 0.99                   | 0.99  | 0.99  | 0.99  | 0.99 | 0.99  | 0.99  | 0.99  | 0.99  | 0.99  | 0.99  | 0.99  | 0.99  | 0.99  |
| <b>Boost</b>                     |                |                        |       |       |       |      |       |       |       |       |       |       |       |       |       |
| <b>W 24</b>                      | r              | -0.13                  | -0.13 | -0.02 | -0.12 | 0.28 | 0.05  | 0.11  | 0.10  | -0.09 | -0.14 | -0.29 | 0.15  | 0.03  | -0.13 |
|                                  | <i>p-value</i> |                        |       |       |       |      |       |       |       |       |       |       |       |       |       |

|             |                |       |      |      |       |      |       |       |       |       |      |      |      |      |       |
|-------------|----------------|-------|------|------|-------|------|-------|-------|-------|-------|------|------|------|------|-------|
| <b>W 25</b> | <i>p-value</i> | 0.99  | 0.99 | 0.99 | 0.99  | 0.99 | 0.99  | 0.99  | 0.99  | 0.99  | 0.99 | 0.99 | 0.99 | 0.99 | 0.99  |
|             | r              | -0.05 | 0.20 | 0.24 | -0.02 | 0.20 | -0.16 | -0.01 | 0.04  | 0.05  | 0.02 | 0.00 | 0.15 | 0.23 | 0.08  |
| <b>W 26</b> | <i>p-value</i> | 0.99  | 0.99 | 0.99 | 0.99  | 0.99 | 0.99  | 0.99  | 0.99  | 0.99  | 0.99 | 0.99 | 0.99 | 0.99 | 0.99  |
|             | r              | -0.25 | 0.18 | 0.30 | 0.10  | 0.22 | 0.13  | -0.07 | -0.07 | 0.17  | 0.28 | 0.19 | 0.30 | 0.25 | -0.04 |
| <b>W 27</b> | <i>p-value</i> | 0.99  | 0.99 | 0.99 | 0.99  | 0.99 | 0.99  | 0.99  | 0.99  | 0.99  | 0.99 | 0.99 | 0.99 | 0.99 | 0.99  |
|             | r              | 0.09  | 0.14 | 0.34 | 0.21  | 0.67 | 0.40  | 0.55  | 0.42  | 0.05  | 0.12 | 0.13 | 0.43 | 0.35 | 0.19  |
| <b>W 28</b> | <i>p-value</i> | 0.99  | 0.99 | 0.99 | 0.99  | 0.99 | 0.99  | 0.99  | 0.99  | 0.99  | 0.99 | 0.99 | 0.99 | 0.99 | 0.99  |
|             | r              | -0.06 | 0.10 | 0.31 | 0.21  | 0.51 | 0.29  | 0.32  | 0.37  | 0.05  | 0.18 | 0.06 | 0.33 | 0.27 | 0.05  |
| <b>W 30</b> | <i>p-value</i> | 0.99  | 0.99 | 0.99 | 0.99  | 0.99 | 0.99  | 0.99  | 0.99  | 0.99  | 0.99 | 0.99 | 0.99 | 0.99 | 0.99  |
|             | r              | -0.06 | 0.01 | 0.32 | 0.11  | 0.42 | 0.19  | 0.28  | 0.21  | 0.06  | 0.05 | 0.08 | 0.26 | 0.34 | 0.10  |
| <b>W 52</b> | <i>p-value</i> | 0.99  | 0.99 | 0.99 | 0.99  | 0.99 | 0.99  | 0.99  | 0.99  | 0.99  | 0.99 | 0.99 | 0.99 | 0.99 | 0.99  |
|             | r              | -0.13 | 0.21 | 0.34 | 0.16  | 0.32 | 0.30  | 0.18  | 0.23  | -0.01 | 0.12 | 0.11 | 0.24 | 0.20 | 0.14  |
|             | <i>p-value</i> | 0.99  | 0.99 | 0.99 | 0.99  | 0.99 | 0.99  | 0.99  | 0.99  | 0.99  | 0.99 | 0.99 | 0.99 | 0.99 | 0.99  |

FDR-adjusted p-values < 0.10 were considered statistically significant and are presented in bold.

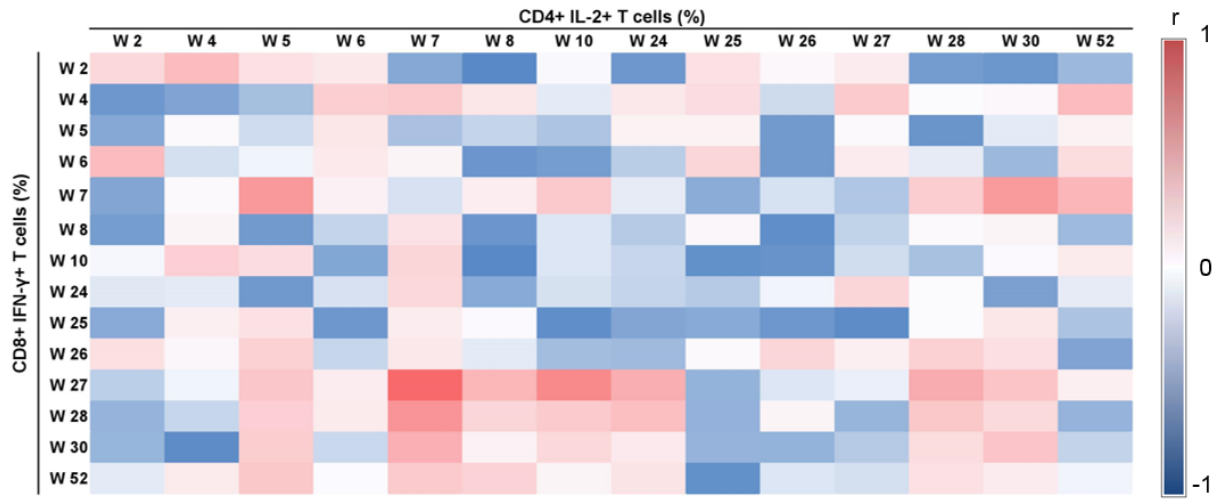

**Appendix E. Heat map of Spearman correlation (r) between IL-2 producing CD4+ helper T cells (CD4+ IL-2+ T cells) and IFN- $\gamma$  producing cytotoxic CD8+ T cells (CD8+ IFN- $\gamma$ + T cells) in the DNA-rAd5 group (Env ex-vivo stimulation of PBMC), HVTN 068 trial.**



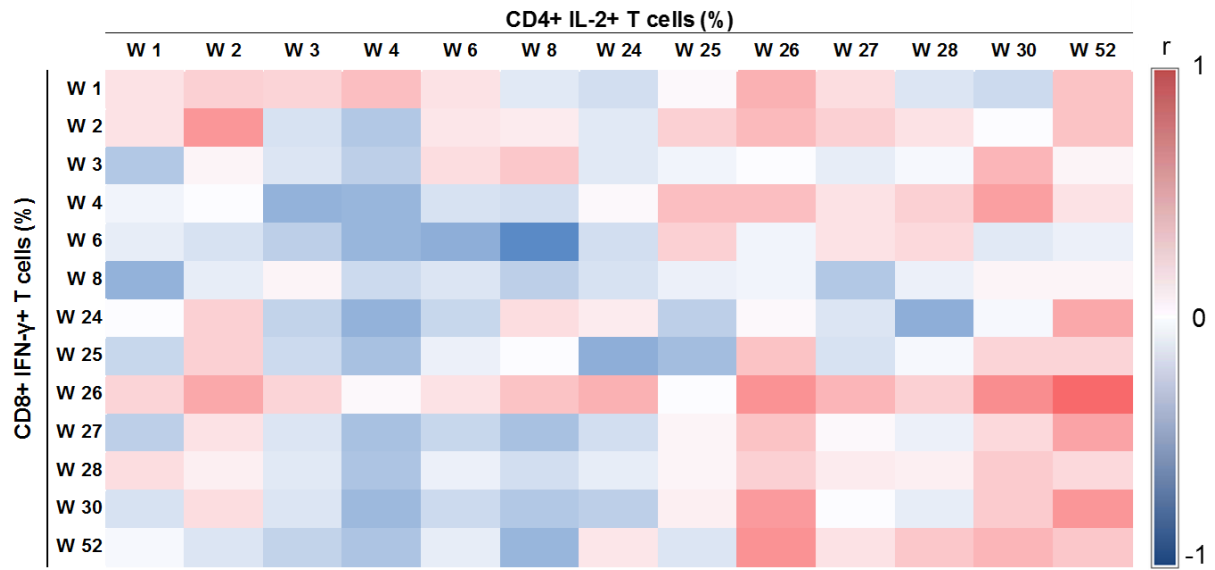

**Appendix F. Heat map of Spearman correlation (r) between IL-2 producing CD4+ helper T cells (CD4+ IL-2+ T cells) and IFN- $\gamma$  producing cytotoxic CD8+ T cells (CD8+ IFN- $\gamma$ + T cells) in the rAd5-rAd5 group (pooled Env, Gag and Pol ex-vivo stimulation of PBMC), HVTN 068 trial.**
